# Supplementary material
Source: PubMed Central journal article supplement (PMC8929295)
Supplement: NIHMS1782122-supplement-2.pdf [file NIHMS1782122-supplement-2.pdf]

**Supplemental Figure 1**

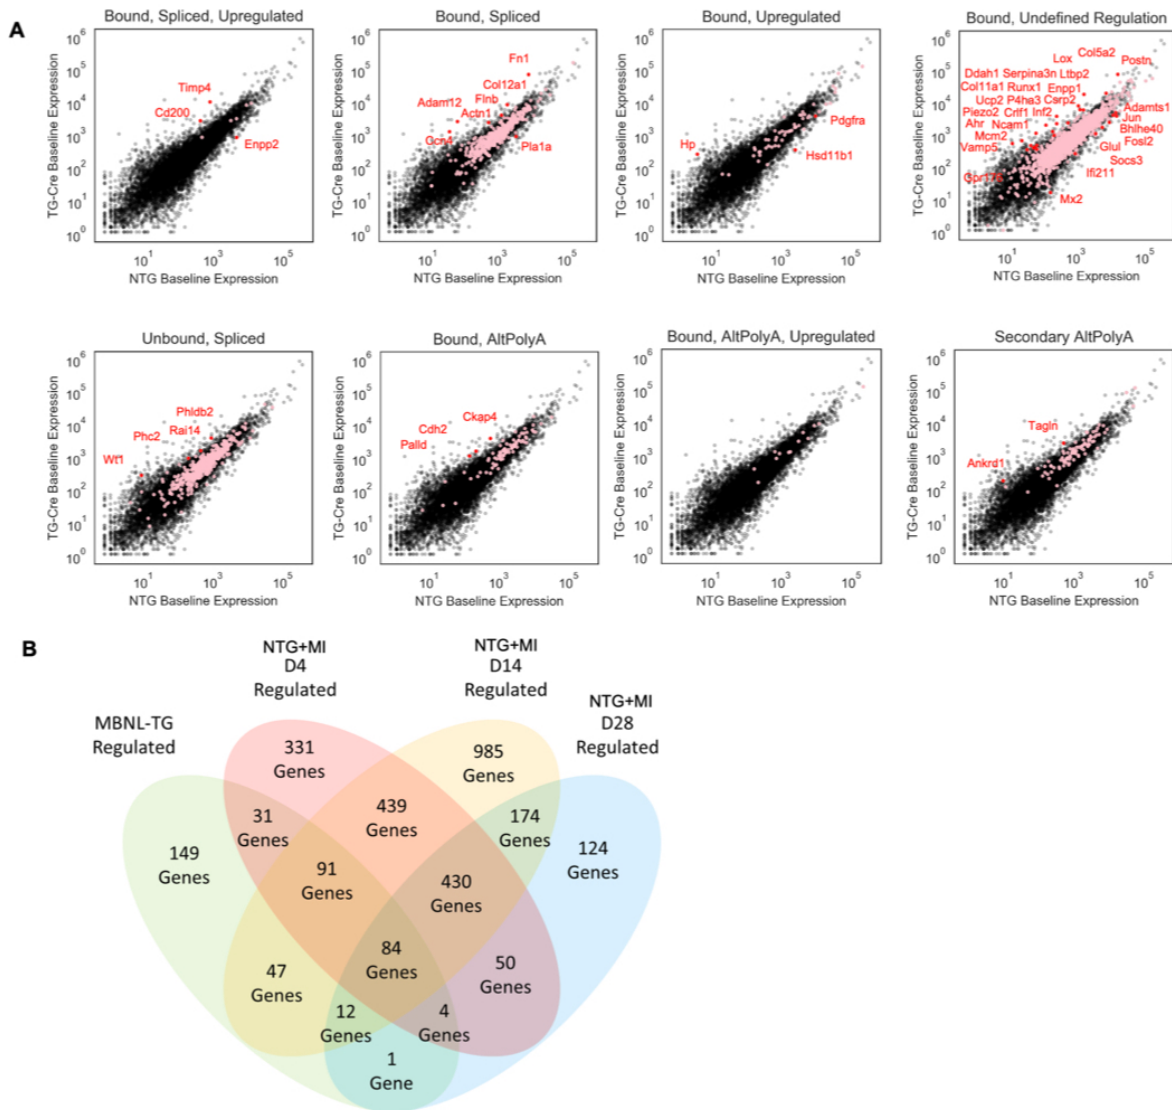

**Supplemental Figure 1: MBNL1 regulated transcripts identified in RNAseq.**

**(A)** Scatterplot of differentially expressed genes between MEF5K4 sorted cardiac fibroblasts from MBNL1 Tg-Tcf21<sup>iCre</sup> versus NTG-Tcf21<sup>iCre</sup> with transcripts identified in previous RIPseq identified in red. **(B)** Venn diagram showing similarly regulated genes between sham operated MBNL1 Tg-Tcf21<sup>iCre</sup> cardiac fibroblasts and NTG cardiac fibroblasts throughout the time course of MI relative to baseline NTG fibroblasts. Related to **Figure 2**

## Supplemental Figure 2

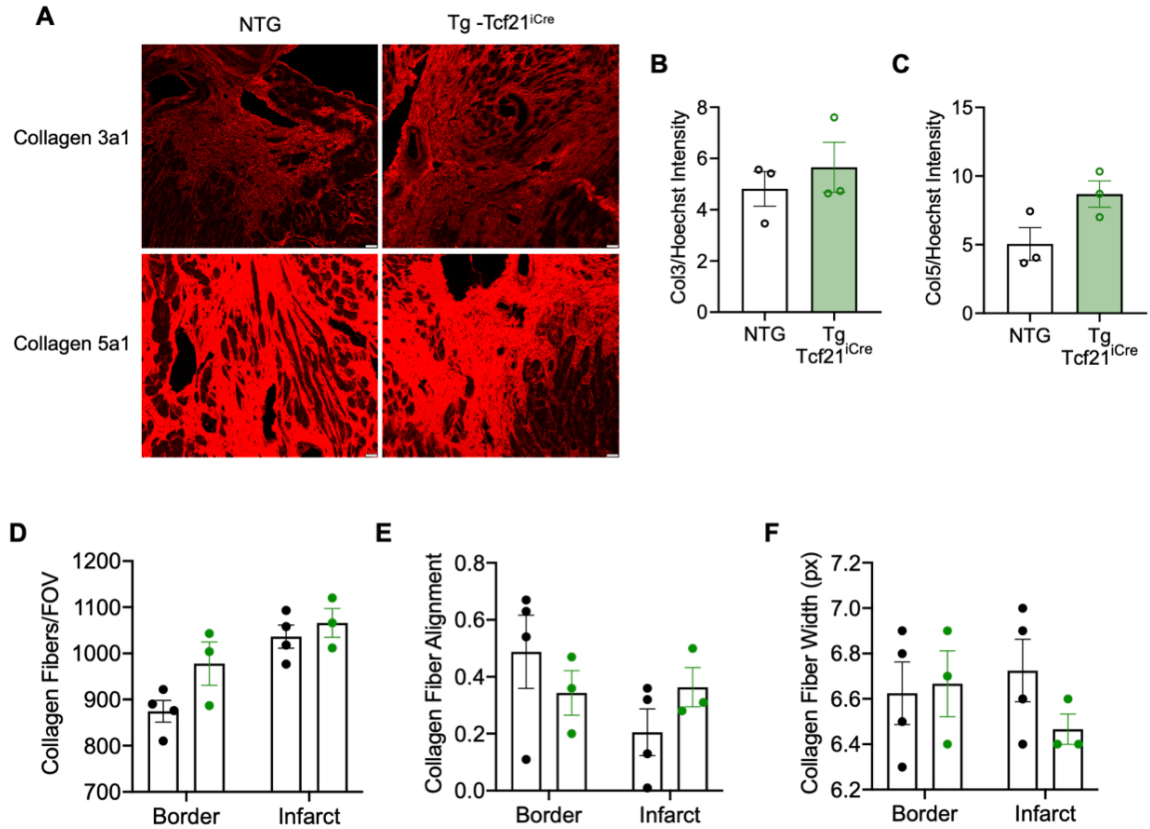

### Supplemental Figure 2: Collagen composition and alignment in MBNL1 overexpression mice 30 days following MI.

(A) Histological images of Collagen 3a1 (top) and Collagen 5a1 (bottom). Quantification of (B) Collagen 3a1 ( $p=0.5150$ ) and (C) Collagen 5a1 ( $p=0.0769$ ) stain intensity normalized to Hoechst signal in MBNL1 Tg-Tcf21<sup>iCre</sup> ( $n=3$ ) and NTG-Tcf21<sup>iCre</sup> ( $n=3$ ) mice 14 days post MI. Dots represent biological replicates, bars represent mean $\pm$ SEM, unpaired t-tests. Quantification of (D) the number of collagen fibers per field of view (Border  $p=0.0841$ , Infarct  $p=0.4887$ ), (E) collagen fiber alignment (Border  $p=0.4244$ , Infarct  $p=0.2199$ ) and (F) collagen fiber width (Border  $p=0.8457$ , Infarct  $p=0.1939$ ) from second harmonic generation of decellularized hearts 30 days post MI. Dots represent biological replicates, MBNL1 Tg-Tcf21<sup>iCre</sup> ( $n=3$ ) and NTG-Tcf21<sup>iCre</sup> ( $n=4$ ), bars represent mean $\pm$ SEM, unpaired t-tests. Related to **Figure 3**.

### Supplemental Figure 3

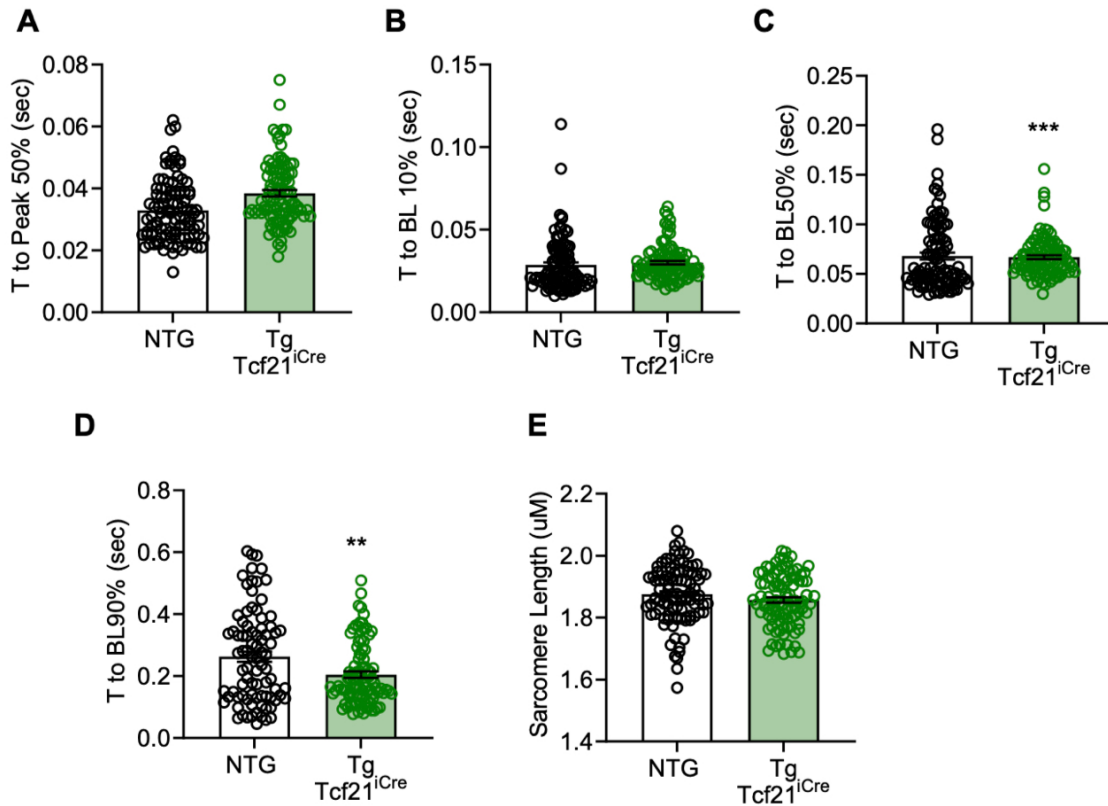

### Supplemental Figure 3: Fibroblast specific overexpression of MBNL1 alters myocyte function following MI.

(A) Time to 50% of peak contraction. Relaxation time from peak contraction to (B) 10% and (C) 50%, and (D) 90% of baseline. (E) Diastolic sarcomere length. Dots represent individual myocytes (30/mouse), MBNL1 Tg-Tcf21<sup>iCre</sup> (n=3 mice) and NTG-Tcf21<sup>iCre</sup> (n=3 mice), bars represent mean±SEM, unpaired t-tests, \*\*\*\*p<0.0001, \*\*\*p<0.001, \*\*p<0.01. Related to **Figure 3**.

Supplemental Figure 4

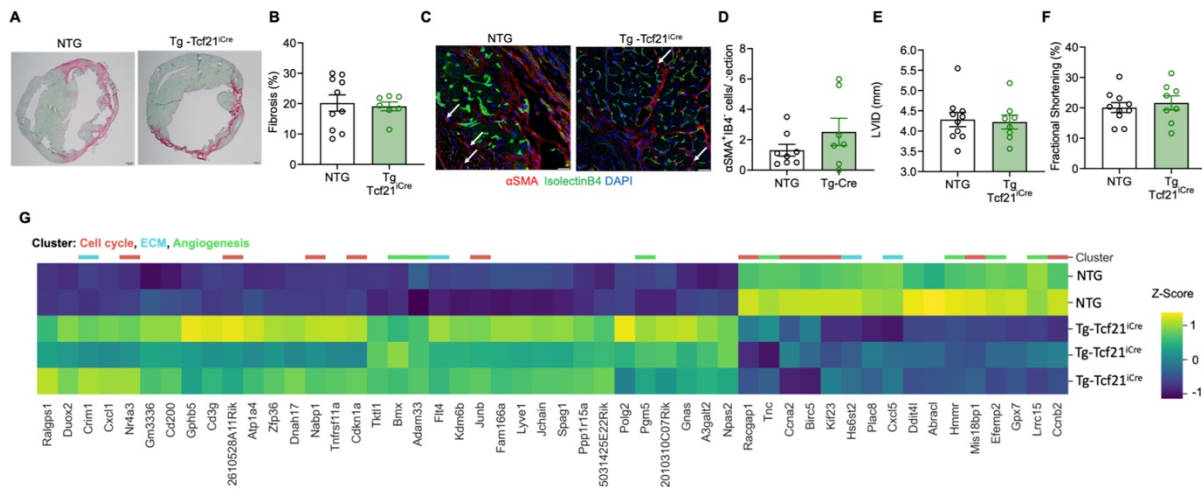

**Supplemental Figure 4: Overexpression of MBNL1 in cardiac fibroblasts promotes a myofibroblast transcriptional state.**

(A) Images and (B) quantification of Sirius Red/Fast Green-stained myocardial sections. Dots represent biological replicates, bars represent mean±SEM, unpaired t-tests,  $p=0.7575$  from MBNL1 Tg-Tcf21<sup>Cre</sup> ( $n=7$ ) and NTG-Tcf21<sup>Cre</sup> ( $n=10$ ) mice 3 months post MI. (C) Immunofluorescent imaging and (D) quantification of myofibroblasts in the border zone of myocardial sections from MBNL1 Tg-Tcf21<sup>Cre</sup> ( $n=7$ ) and NTG-Tcf21<sup>Cre</sup> ( $n=8$ ) mice 3 months following MI. Myofibroblasts are αSMA (red) positive and negative for the endothelial marker isolectinB4 (IB4, green). Nuclei are stained blue. Arrows show αSMA<sup>+</sup>IB4<sup>-</sup> cells. Scalebar=25μm  $p=0.2207$ . Echocardiographic analysis of left ventricle (E) diastolic chamber diameter ( $p=0.8109$ ) and (F) fractional shortening ( $p=0.5840$ ), 3 months post MI in MBNL1 Tg-Tcf21<sup>Cre</sup> ( $n=8$ ) and NTG-Tcf21<sup>Cre</sup> ( $n=10$ ) mice. Dots represent biological replicates, bars represent mean±SEM, unpaired t-tests for statistical comparison. (G) Heatmap of differentially expressed genes in MBNL1 Tg-Tcf21<sup>Cre</sup> versus NTG-Tcf21<sup>Cre</sup> cardiac fibroblasts 4 days post MI. Colored bars represent functionally clustered genes: Extracellular matrix (ECM) = blue, Cell cycle = red, and Angiogenesis = green. Related to Figure 3.

**Supplemental Figure 5**

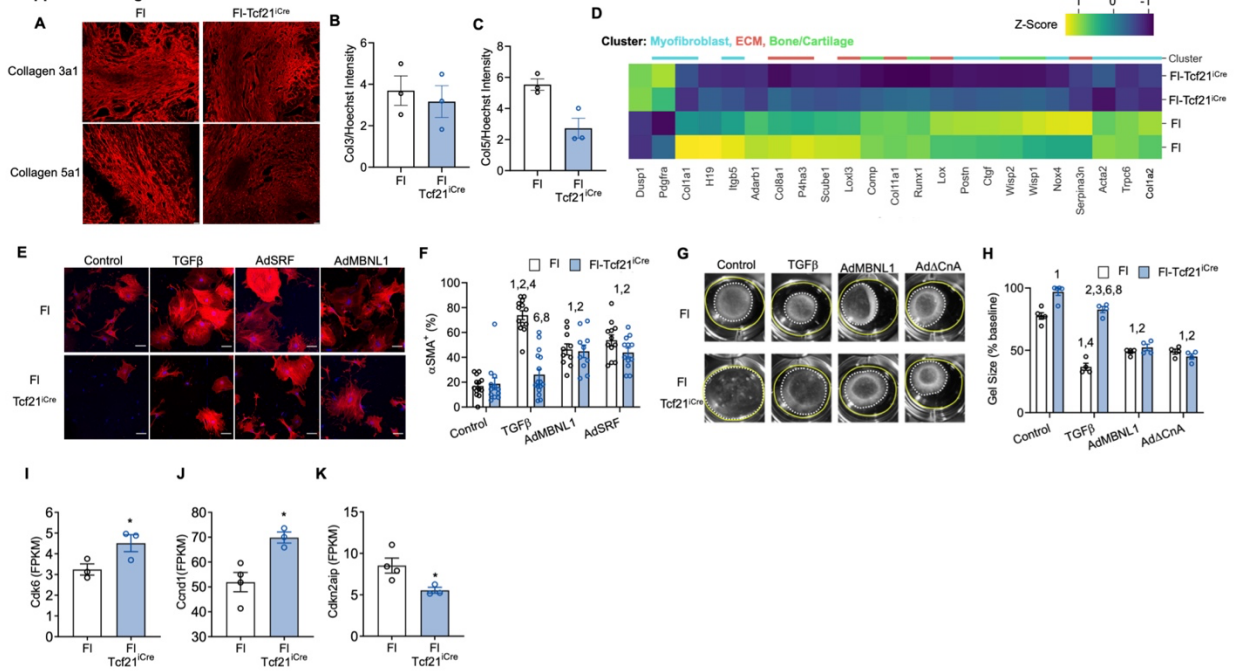

**Supplemental Figure 5: MBNL1 is required for myofibroblast phenotype and function.**

**(A)** Images of Collagen 3a1 (top) and Collagen 5a1 (bottom). Quantification of **(B)** Collagen 3a1 ( $p=0.6408$ ) and **(C)** Collagen 5a1 ( $p=0.0191$ ) stain intensity normalized to Hoechst signal in  $MBNL1^{FI/FI}$ -Tcf21<sup>iCre</sup> ( $n=3$ ) and  $MBNL1^{FI/FI}$  ( $n=3$ ) mice 14 days post MI. Dots represent biological replicates, bars represent mean $\pm$ SEM, unpaired t-tests. **(D)** Heatmap of differentially expressed genes in  $MBNL1^{FI/FI}$ -Tcf21<sup>iCre</sup> versus  $MBNL1^{FI/FI}$  cardiac fibroblasts 14 days post MI. Colored bars represent functionally clustered genes: myofibroblast=blue, ECM=red, and bone/cartilage=green. **(E)** Immunofluorescent images and **(F)** quantification of the number of cardiac fibroblasts from  $MBNL1^{FI/FI}$  and  $MBNL1^{FI/FI}$ -Tcf21<sup>iCre</sup> mice with  $\alpha$ SMA<sup>+</sup> stress fibers as a percentage of the total number counted.  $\alpha$ SMA<sup>+</sup> stress fibers (red) and nuclei (blue). Dots represent biological replicates ( $n=12$ ), bars represent mean $\pm$ SEM, numbers represent  $p<0.05$  from ANOVA statistical test with Tukey post hoc comparisons: 1- FI Control, 2- FI-Cre Control, 3- FI TGF $\beta$ , 4- FI-Cre TGF $\beta$ , 5- FI AdMBNL1, 6- FI-Cre AdMBNL1, 7- FI AdSRF, 8- FI-Cre AdSRF. **(G)** Representative images and **(H)** quantification of contracted collagen gel matrices seeded with tamoxifen-treated  $MBNL1^{FI/FI}$ -Tcf21<sup>iCre</sup> and  $MBNL1^{FI/FI}$  cardiac fibroblasts. Yellow rings mark original gel size and white dashed rings show contracted gel size. Dots represent biological replicates ( $n=4$ ), bars represent mean $\pm$ SEM, numbers represent  $p<0.05$  from ANOVA statistical test with Tukey post hoc comparisons: 1- FI Control, 2- FI-Cre Control, 3- FI TGF $\beta$ , 4- FI-Cre TGF $\beta$ , 5- FI AdMBNL1, 6- FI-Cre AdMBNL1, 7- FI Ad $\Delta$ CnA, 8- FI-Cre Ad $\Delta$ CnA. **(I-K)** Gene expression (FPKM, fragments per kilobase of transcript) of cell cycle regulators in  $MBNL1^{FI/FI}$ -Tcf21<sup>iCre</sup> ( $n=3$ ) and  $MBNL1^{FI/FI}$  ( $n=4$ ) cardiac fibroblasts 4 days post MI. Dots represent biological replicates, bars represent mean $\pm$ SEM, unpaired t-test, \* $p<0.05$ . Related to **Figure 4**.

Supplemental Figure 6

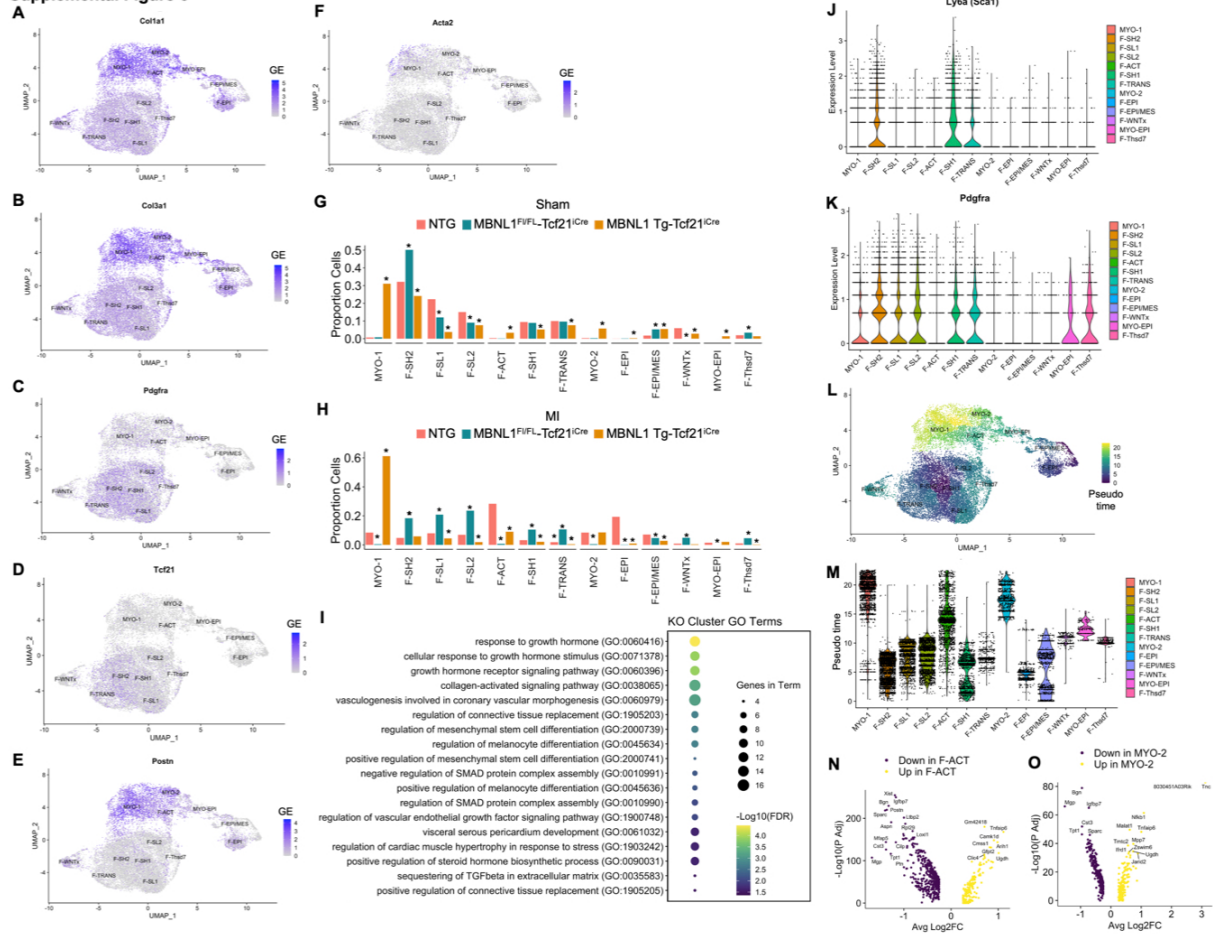

**Supplemental Figure 6: scRNAseq cluster analysis.**

(A-F) Gene expression of select fibroblast state markers visualized on dimensionality reduction plots. Cell population percentages broken up by genotype in (G) Sham and (H) 7 day post MI animals, significant differences from NTG represented with \*. (I) Functional clustering of genes expressed in quiescent fibroblast clusters that significantly expanded in MBNL1<sup>F1/F1</sup>-Tcf21<sup>iCre</sup> mice versus MBNL1<sup>F1/F1</sup> in response MI. The number of genes in each GO category is correlated with the circle size and false discovery rate correlated with color. Gene expression by cluster of (J) *Ly6a* and (K) *Pdgfra*. Pseudotime analysis of all clusters as visualized by (L) UMAP or (M) violin plot. Significantly differentially expressed genes between clusters (N) MYO-2 versus MYO-1 and (O) F-ACT versus MYO-1. Related to Figure 5.

## Supplemental Figure 7

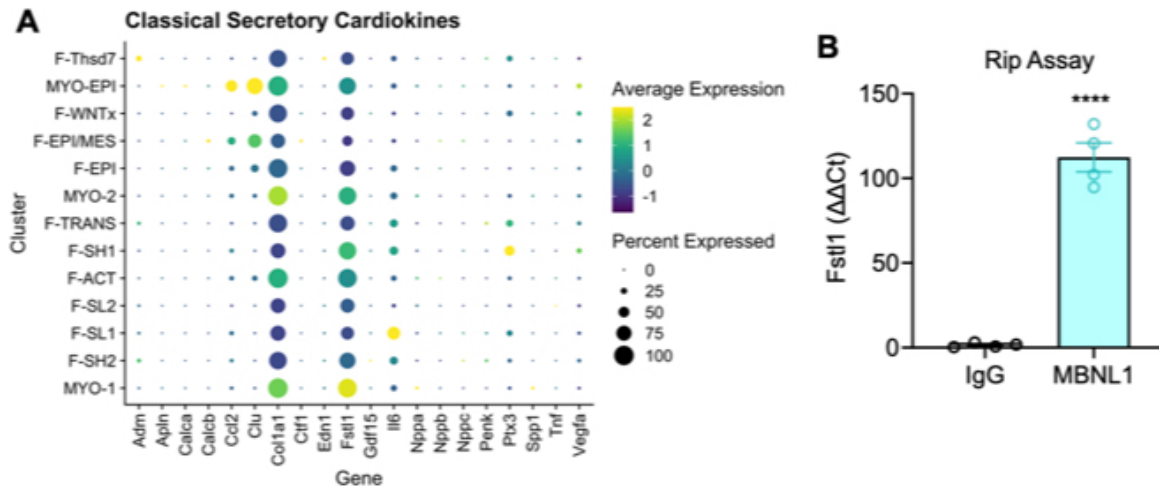

### Supplemental Figure 7: Cardiokines unique to myofibroblast clusters.

(A) Dot plot showing differential expression of classical secretory cardiokines by cluster from scRNAseq. (B) Expression of *Fstl1* transcripts immunoprecipitated by MBNL1 in fibroblasts overexpressing MBNL1 versus the IgG control. Dots represent biological replicates, bars represent mean $\pm$ SEM, unpaired t-test, \*\*\*\* $p$ <0.0001. Related to **Figure 3 & 5**.

**Supplemental Table 1: Primers used for gene expression analysis, Related to STAR methods.**

| Name             | 5-3 Seq                 |
|------------------|-------------------------|
| GAPDH Human Fwd  | GAGTCAACGGATTTGGTCGT    |
| GAPDH Human Rvs  | GACAAGCTTCCCGTTCTCAG    |
| 18s Human Fwd    | GTAACCCGTTGAACCCCAT     |
| 18s Human Rvs    | CCATCCAATCGGTAGTAGCG    |
| MBNL1 Human Fwd  | CTCTGTCCGGTTGACAGGC     |
| MBNL1 Human Rvs  | CTGAAAACATTGGCACGGGT    |
| Acta2 Human Fwd  | GTGTTGCCCTGAAGAGCAT     |
| Acta2 Human Rvs  | GCTGGGACATTGAAAGTCTCA   |
| 18s Mouse Fwd    | GTAACCCGTTGAACCCCAT     |
| 18s Mouse Rvs    | CCATCCAATCGGTAGTAGCG    |
| Acta2 Mouse Fwd  | ACCCACCCAGAGTGGAGAAG    |
| Acta2 Mouse Rvs  | AGCATCATCACCAGCGAAG     |
| Col1a1 Mouse Fwd | AATGCAATGAAGAACTGGACTG  |
| Col1a1 Mouse Rvs | CCCTCGACTCCTACATCTTCTG  |
| MBNL1 Mouse Fwd  | CACTGAAAGGTCGTTGCTCCA   |
| MBNL1 Mouse Rvs  | CGCCCATTTATCTCTAACTGTGT |
| Fstl1 Mouse Fwd  | CACGGCGAGGAGGAACCTA     |
| Fstl1 Mouse Rvs  | TCTTGCCATTACTGCCACACA   |
| Sox9 Mouse Fwd   | TATCTTCAAGGCGCTGCAA     |
| Sox9 Mouse Rvs   | TCGGTTTTGGGAGTGGTG      |
| Cdkn1a Mouse Fwd | GCAGACCAGCCTGACAGATTT   |
| Cdkn1a Mouse Rvs | CTGACCCACAGCAGAAGAGG    |
